# Supplementary material for: Growth in the Economic and Hydraulic Engineering Capacities Drives Water Quality Improvement in the Eastern Region of Nansi Lake, China
Source: Frontiers journal article supplement (doi:10.3389/fenvs.2022.931642), 2022-07-01
Supplement: Data_Sheet_1.docx [file Data_Sheet_1.docx]

Supplementary Material

Table Information on the rivers in the study area

| **River** | **Length**  **(km)** | **Length in Jining**  **(km)** | **Basin area**  **(km2)** | **Area in Jining**  **(km2)** |
| --- | --- | --- | --- | --- |
| GR | 84.0 | 55.3 | 1331.0 | 879.0 |
| SR | 159.0 | 146.0 | 2357.0 | 1991.0 |
| BR | 60.0 | 60.0 | 1099.0 | 1099.0 |

Table Information on the hydrological stations investigated in the study area

| **Hydrological**  **station** | **Name** | **Basin** | **Latitude**  **(**°**N))** | **Longitude**  **(**°**E)** | **Control area**  **(km2)** |
| --- | --- | --- | --- | --- | --- |
| HS1 | Huangzhuang | GR | 35.44 | 116.64 | 1027 |
| HS2 | Shuyuan | SR r | 35.63 | 117.01 | 1542 |
| HS3 | Hezhuang reservoir | SR | 35.64 | 117.54 | 172 |
| HS4 | Nishan reservoir | SR | 35.48 | 117.20 | 254 |
| HS5 | Malou | BR | 35.33 | 116.85 | 505 |
| HS6 | Xiwei reservoir | BR r | 35.40 | 117.03 | 114 |
